# Supplementary material for: CXCL12 Neutralizing Antibody Promotes Hair Growth in Androgenic Alopecia and Alopecia Areata
Source: MDPI journal article supplement (doi:10.3390/ijms25031705), 2024-01-30
Supplement: s1 [file s1]

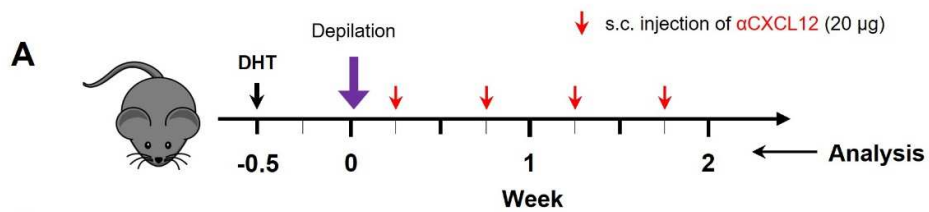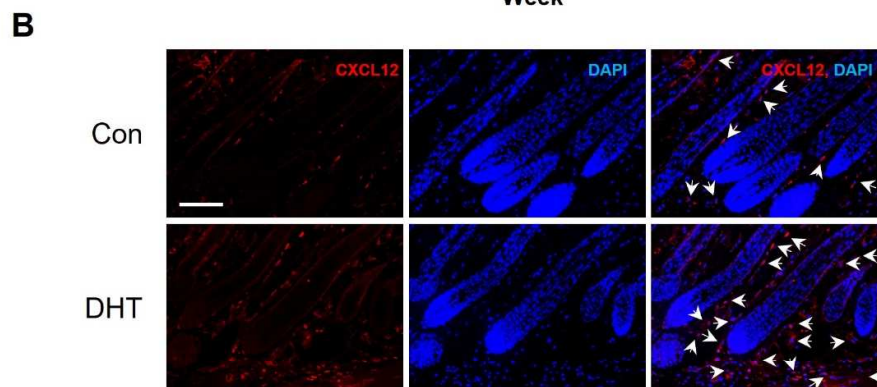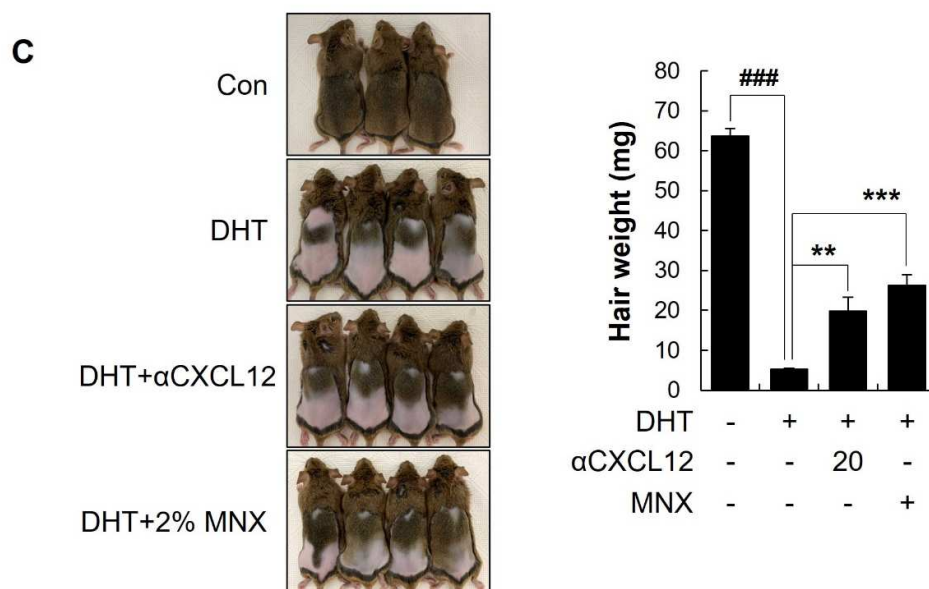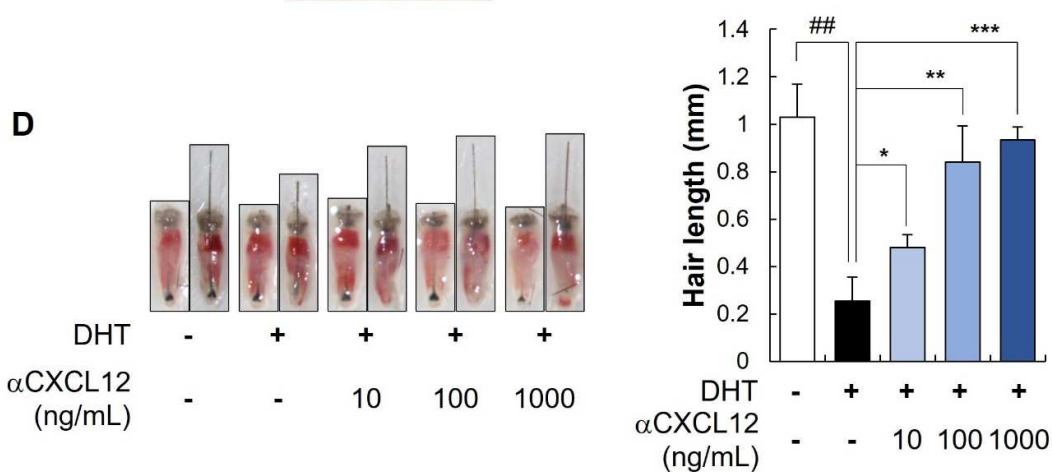

2 **Figure S1. Neutralization of CXCL12 promotes hair growth in a DHT-induced AGA model.** (A)  
3 The back skin of 7-week-old C<sub>3</sub>H male mice was shaved, and subcutaneous injections of DHT were used  
4 to induce the AGA model. (B) The expression of CXCL12 in the dorsal skin of DHT-treated mice  
5 increased. CXCL12<sup>+</sup> cells (red) are indicated by white arrows, and DAPI staining (blue) indicates cell  
6 nuclei. The scale bar is set at 100  $\mu$ m. (C)  $\alpha$ CXCL12 (20  $\mu$ g per head) were subcutaneously injected in  
7 the presence of DHT twice a week for 2 weeks. A daily topical treatment of 2% minoxidil served as a  
8 positive control.  $\alpha$ CXCL12 administration accelerated hair growth in DHT-treated C<sub>3</sub>H mice, and the hair  
9 weight was measured. ###  $p < 0.001$  vs control, \*\*  $p < 0.01$ , \*\*\*  $p < 0.001$  vs DHT-treated. (D)  
10  $\alpha$ CXCL12 treatment increased the length of mouse vibrissa follicles in the AGA mimic ex vivo model.  
11  $\alpha$ CXCL12 (10, 100, or 1000 ng/mL) were treated in the presence of 100 nM of DHT for 48 h. ##  $p <$   
12  $0.01$  vs control, \*  $p < 0.05$ , \*\*  $p < 0.01$ , \*\*\*  $p < 0.001$  vs DHT-treated. The asterisk and sharp symbols  
13 indicate statistical differences in the Student's  $t$ -test.

14

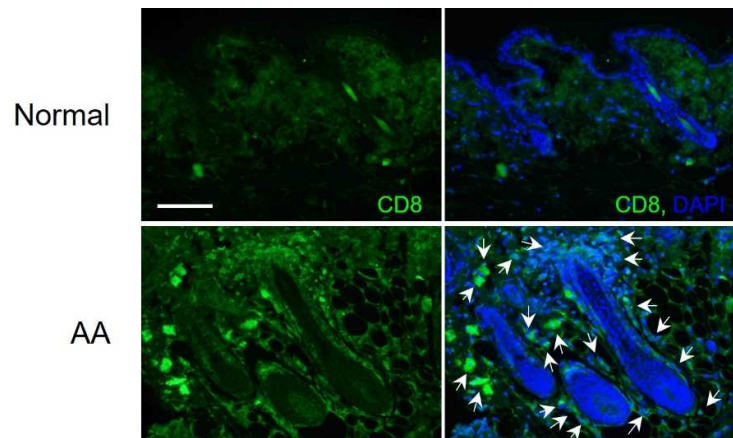

15

16 **Figure S2. Expression of CD8<sup>+</sup> cells in alopecia areata model.** SDLN cells were isolated from AA  
17 mice and intradermally injected into the dorsal skin to induce AA. Severe hair loss was observed after 12  
18 weeks, and skin sections from normal and AA mice were stained with an anti-CD8 antibody (green).  
19 CD8<sup>+</sup> cells were increased in AA model. DAPI staining (blue) indicates cell nuclei. The scale bar is set at  
20 100  $\mu$ m.

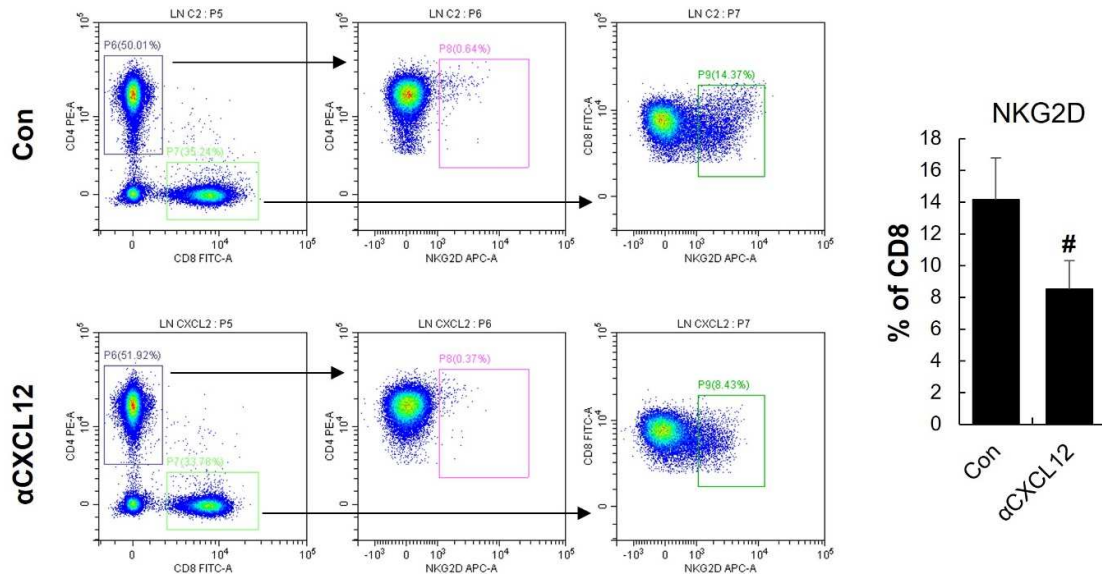

21

22 **Figure S3. CXCL12 neutralization decreased the expression of NKG2D<sup>+</sup> cells in CD8<sup>+</sup> T cells.** Flow  
 23 cytometric analysis was performed to measure the NKG2D expression in CD8<sup>+</sup> T cells by gating SDLN  
 24 cells from two groups, and  $\alpha$ CXCL12 treatment reduced the NKG2D expression. #  $p < 0.05$ , vs control.  
 25 The sharp symbols indicate statistical differences in the Student's *t*-test.

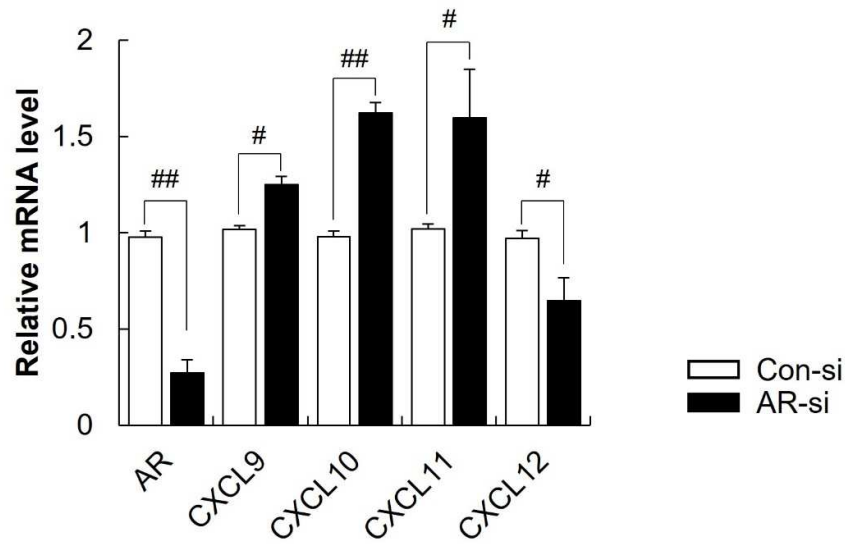

26

27 **Figure S4. mRNA expression of CXCL families after transfection of androgen receptor siRNA.**  
 28 Knockdown of androgen receptor (AR) significantly down-regulated CXCL12 mRNA, while increased  
 29 CXCL9, CXCL10, and CXCL11 in dermal fibroblasts. # $p < 0.05$ , ## $p < 0.01$  vs. control. A sharp indicates  
 30 a statistical difference in a Student's *t*-test.

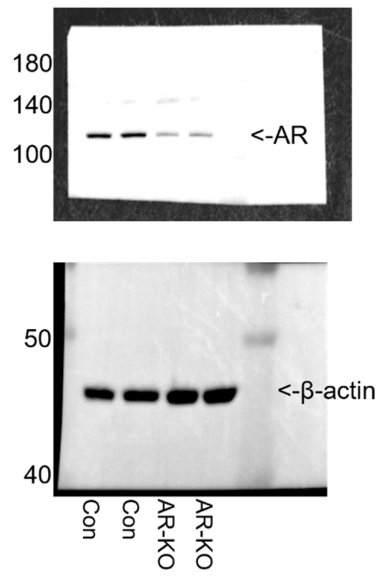

31

32 **Original western blot for Figure 2D.**

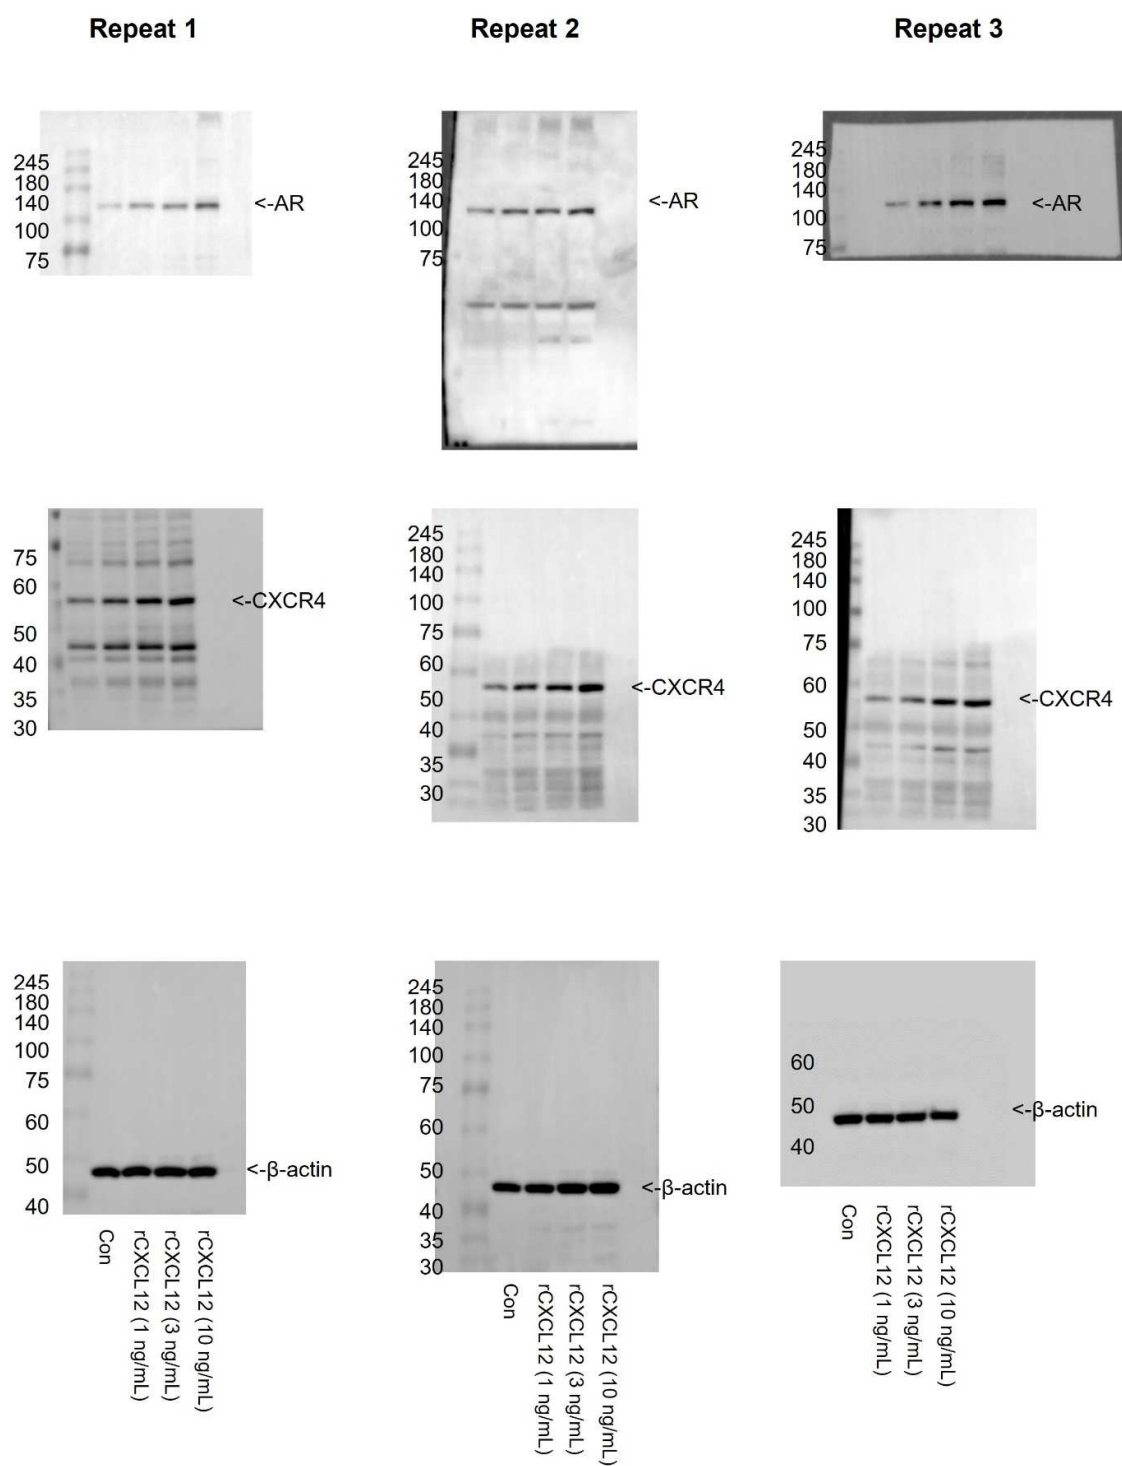

Original western blot for three repeats (Fig.3C)
